# Supplementary material for: 2i Maintains a Naive Ground State in ESCs through Two Distinct Epigenetic Mechanisms
Source: PubMed Central journal article supplement — Stem Cell Reports. 2017 Apr 27;8(5):1312–28. doi: 10.1016/j.stemcr.2017.04.001 (PMC5425728; doi:10.1016/j.stemcr.2017.04.001), 2017-04-27
Supplement: mmc1.pdf [file mmc1.pdf]

**Stem Cell Reports, Volume 8**

**Supplemental Information**

**2i Maintains a Naive Ground State in ESCs through Two Distinct Epigenetic Mechanisms**

**Ye-Ji Sim, Min-Seong Kim, Abeer Nayfeh, Ye-Jin Yun, Su-Jin Kim, Kyung-Tae Park, Chang-Hoon Kim, and Kye-Seong Kim**

## Supplemental information

### Supplemental Materials and Methods

#### Cell culture and inhibitors

The mouse ESC lines J1 (ATCC SCRC-1010), CCE, and *Jmjd2c* KO were cultured on mitomycin C-treated CF1 MEF feeder cells or 0.1% gelatin-coated plates at 37°C with 5% CO<sub>2</sub> in Dulbecco's modified Eagle medium (DMEM; Hyclone) supplemented with 15% fetal bovine serum (FBS; Hyclone), 0.1 mM β-mercaptoethanol (Gibco), 100× penicillin/streptomycin (Gibco), 2 mM GlutaMAX (Gibco), 0.1 mM NEAA, and 1000 U/ml LIF (Millipore). We passaged the ESCs at a ratio of 1:20 every 3 days. We cultured 293T cells in DMEM supplemented with 10% FBS, 100× penicillin/streptomycin (Gibco), 2 mM GlutaMAX (Gibco), and 0.1 mM NEAA at 37°C with 5% CO<sub>2</sub>. For the 2i culture condition, we cultured ESCs on 0.1% coated gelatin plates using the same ESC culture medium supplemented with Mek1 and Gsk3 inhibitors without LIF. We used the following inhibitors in our study: 1 μM PD0325901 (Stemgent, 04-0006-02), 3 μM CHIR99021 (Stemgent, 04-0004-02), 5 μM FR180204 (Millipore, 328010), 10 μM SU5402 (Abmole, M2194), 5 μM MG132 (Merck, 474790), 5 μM 5-Carboxyl-8-HQ (Merck, 420201), and 1–10 μM UNC0638 (Sigma-Aldrich, U4885).

#### Dot blot

We isolated genomic DNA (gDNA) using the Qiagen DNeasy Blood & Tissue Kit according to the manufacturer's protocol. We denatured the isolated gDNA in 0.8 M NaOH/20 mM EDTA for 10 min at 95°C. We then neutralized the samples with 2 M ammonium acetate (pH7.0) and serially diluted them twofold. We spotted the samples on a nitrocellulose membrane using a Bio-Dot apparatus (Bio-Rad). We washed the blotted membrane in 2×SSC buffer and exposed it to UV light for 2 min. After blocking the membrane with 5% skim milk for 1 hour, we incubated it overnight at 4°C with primary antibodies diluted in blocking solution. The primary antibodies were mouse anti-5-methylcytosine antibody (Abcam 1:500) and rabbit anti-5-hydroxymethylcytosine polyclonal antibody (Active Motif, 1:2000).

#### Quantitative reverse transcription-polymerase chain reaction (qRT-PCR)

We extracted total RNA with TRIzol reagent (Invitrogen) according to the manufacturer's protocol. We dissolved the RNA pellets in nuclease-free water and determined the RNA concentration of each sample with a NanoDrop. We reverse-transcribed 1 μg RNA into cDNA using SuperScript III Reverse Transcriptase (Invitrogen). We amplified the cDNA using IQ

SYBR Green Supermix (Bio-Rad) with appropriate PCR primer sets (Table S2). We performed real-time PCR assays on a CFX96 Touch real-time PCR detection system.

**Table S2. qPCR primers used in the study**

|               | <b>Forward</b>            | <b>Reverse</b>            |
|---------------|---------------------------|---------------------------|
| <i>L32</i>    | CGCAAGTTCCTGGTCCACA       | TGCTGCTCTTTCTACAATGGCT    |
| <i>Jmjd2c</i> | ATGGATCGCAGATTGCAATGA     | TTCCTCTCCCCTTGGATTACAT    |
| <i>Oct4</i>   | TAGCATTGAGAACCGTGTGAG     | ACTTGATCTTTTGCCCTTCTGG    |
| <i>Sox2</i>   | TTTGCAAGCAACTTTTGTACAGTA  | TCCTTCCTTGTTTGTAAACGGTC   |
| <i>Dnmt3a</i> | CCATTACCACCAGGTCAAACCTCTA | AAGCGGCTCATGTTGGAGAC      |
| <i>Dnmt3b</i> | ACAACCGTCCATTCTTCTGGAT    | TTCATTCCGGGTAGGTTACC      |
| <i>Dnmt3l</i> | AGGATGTCCGTGGCAGAGACTA    | AGCTTGCTCCTGCTTCTGACTT    |
| <i>Tet1</i>   | CTTTCTCTGGTGTACCTGTTG     | TATAGTGGCAGGACGTGGAGTT    |
| <i>Tet2</i>   | ATTCTCAGGAGTCACTGCATGTT   | TACATAGGCAGCACGTGGAAC     |
| <i>Prdm14</i> | TTCTTCACGTCCATGAGAGGC     | TCTGATGTGTGTTCCGGAGTATGCT |
| <i>G9a</i>    | AAGATCTACGGTTCACGCATT     | TTGCACTTCTCAGAGCCACACT    |

### **Generation of mouse *Jmjd2c* KO ESCs**

We transfected cells with pSpCas9(BB)-2A-GFP (PX458) or pSpCas9(BB)-2A-Puro (PX459) (Addgene #48138, 48139) to clone a *Jmjd2c*-guide sequence. We performed an insert/deletion assay using T7 endonuclease I (NEB). To generate *Jmjd2c* KO ESCs, we transfected CCE cells with pSpCas9 (BB) containing *Jmjd2c*-guide RNA and homologous recombination (HR) donor with a puromycin selection cassette. We incubated the cells with 3  $\mu$ g/ml puromycin to isolate puromycin-resistant colonies. We confirmed HR events by gDNA-mediated PCR to detect HR events in selected colonies. Finally, we confirmed the *Jmjd2c* KO cells by PCR, sequencing, and Western blot.

### **Western blot**

To perform Western blot analysis, we washed the cells with PBS and lysed them with RIPA buffer (50 mM Tris-HCl pH 7.4, 150 mM of NaCl, 1% sodium deoxycholate, 1% Triton X-100, and 0.1% SDS). We used the cell lysates for Western blots and other experiments. We subjected 20  $\mu$ g lysate protein to SDS-polyacrylamide gel electrophoresis, transferred it to a PVDF membrane, and blotted it with appropriate antibodies. We detected proteins using HRP-conjugated secondary antibodies and ECL reagents. We visualized the bands using the ChemiDoc MP System (Bio-Rad).

### **GST pull down, *in vitro* kinase assay, ubiquitination assay, and *in vitro* methylation assay**

For the pull-down analysis, we generated a mammalian GST expression vector system. We transfected GST-transgenes into 293T cells using a PEI transfection method. Two days after transfection, we washed cells with PBS and lysed them with RIPA buffer (50 mM Tris-HCl pH 7.4, 150 mM NaCl, 1% sodium deoxycholate, 1% Triton X-100, and 0.1% SDS). After clarifying cell lysates in a microcentrifuge, we added Glutathione Sepharose 4B and incubated them at 4°C overnight. We then washed the beads with RIPA buffer three times, added 1×SDS sample buffer, and performed Western blots.

We conducted an *in vitro* Mek1 kinase assay as follows. We transfected GST-JMJD2C and GST-MEK1 into 293T cells, isolated the proteins individually using glutathione beads, mixed them together, and incubated them in kinase buffer (25 mM Tris-HCl pH 7.5, 150 mM NaCl, 10 mM MgCl<sub>2</sub>, 20 mM β-GP, 100 μM Na<sub>3</sub>O<sub>4</sub>V, 400 μM ATP, and 2 mM DTT) for 6 h at 37°C. We stopped the reaction by adding 2×SDS sample buffer and then performed Western blots. For ubiquitination assays, we transfected GST-JMJD2C and 5Myc-MEK1 with HA-Ub separately into 293T cells. We detected JMJD2C ubiquitination using anti-HA antibody after the pull-down assay. After washing the beads three times with RIPA buffer, we added 1×SDS sample buffer and performed Western blots.

We transfected GST-PRDM14, GST-DNMT1, GST-DNMT3A, and/or DNMT3B into 293T cells, individually isolated the proteins using glutathione beads, mixed them together, and incubated them in methylation buffer (50 mM Tris-HCl pH 8.8, 5 mM MgCl<sub>2</sub>, and 4 mM DTT) with S-adenosyl-L-[methyl-<sup>3</sup>H] methionine (85 Ci/mmol from a 0.5 mCi/ml stock solution, Perkin-Elmer) for 6 hours at RT. We stopped the reaction by adding 2×SDS sample buffer and performed Western blots. We used the following antibodies: anti-JMJD2C (Abcam, ab85454 or Bethyl, A300-885A), anti-GAPDH (Cell signaling, 2118), anti-H3K4me3 (Millipore, 07-473), anti-H3K4me2 (Millipore, 07-030), anti-H3K9me3 (Abcam, ab8898), anti-H3K9me2 (Abcam, ab1220), anti-H3K27me3 (Millipore, 07-449), anti-H3K27me2 (Millipore, 07-451), anti-H3K36me3 (Abcam, ab9050), anti-H3K36me2 (Millipore, 07-369), anti-Histone3 (Abcam, ab1791), anti-OCT4 (Santa, sc-5279), anti-SOX2 (Abcam, ab97959), anti-Phospho-ERK1/2 (Cell Signaling, 9106), anti-ERK1/2 (Cell Signaling 9102), anti-4G10 (Millipore, 05-321), anti-GST (Abfrontier, LF-PA0189), anti-HA (Santa, sc-7392), anti-Myc (Santa, sc-40), anti-GFP (Santa, sc-9996), anti-DNMT3A (Novus, IMG-268A), anti-DNMT3B (Abcam, ab2851), anti-FLAG (Sigma, F3165), anti-TET1 (Abcam, ab156993), and anti-PRDM14 (Abcam, ab187881).

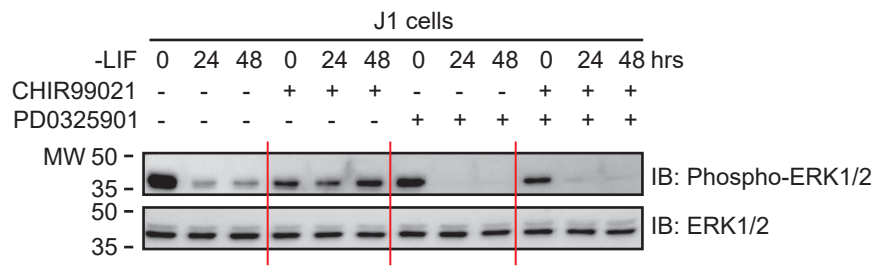

Figure S1

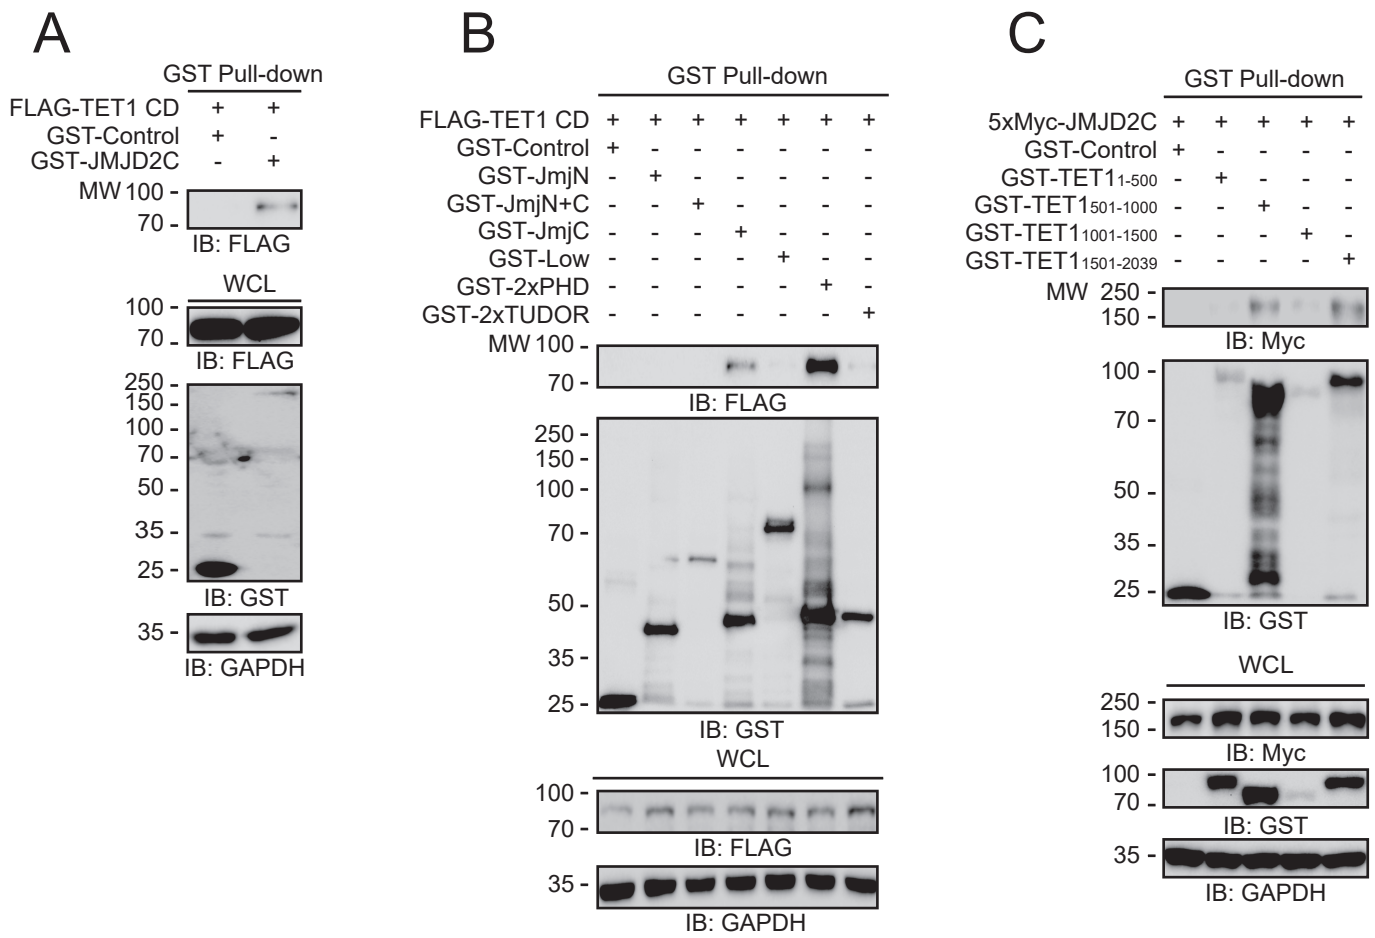

Figure S2

**A**

>mouse *Jmjd2c* genomic DNA sequence

GAGGGGGTAAATACCCCTTATCTCTATTTTGGAAATGTGGAAAAC**AACATTTGCGTGGCACA**  
**CGG**AGGACATGGATCTCTACAGTATTAATTATCTCCACTTTGGGGAGCCCAAGTCTTG

Cas9-*Jmjd2c* target sequence : **AACATTTGCGTGGCACACGG**

**B**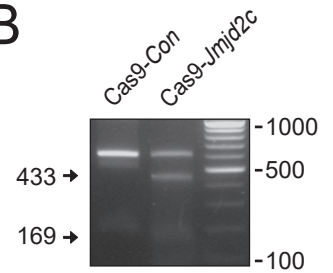**C**

Addgene 17448 / pLenti CMV GFP Puro

>mouse *Jmjd2c* N-terminal targeting sequence

AGTACTATTTTTTATTTTCTAACACCTGCTTTTGGCTTTT  
 TCTCTCCCT**GTCTTTGTCTCTAGGGTGTGGATGAATGG**  
**AATATAGCTCGCTAAATACAGTCTTGGATGTGGTTGA**  
**AGAAGAGTGTGGTATTTCTATTGAGGGGGTAAATACC**  
**CCTTATCTCTATTTTGGAAATGTGGAAAAC**AACATTTGC****  
**GTGGCACAGAATTCTACCGGGTAGGGGAGGCGCTTT**  
**TCCCAAGGCAGTCTGGAGCATGCGCTTTAGCAGCCC**  
**CGCTGGGCAC**

>mouse *Jmjd2c* C-terminal targeting sequence

**AGCCCGGTGCCTGAC**GCCCCGCCCCACGACCCGCAG  
 CGCCCCGACCGAAAAGGAGCGCACGACCCCATGCATCT  
 CGACGGAGGACATGGATCTCTACAGTATTAATTATCTC  
**CAC**TTTGGGGAGCCCAAGTCTTGGCAAGTCACTTGT  
 TAATATTCACACCATTAGAGTTGAGAATCATTGATTGT  
 TGTTCAATTTGATGAGAATTTACTCTTTTATAGAGTG  
 AGTGTAAAGGAAGTTTTGGGTTG

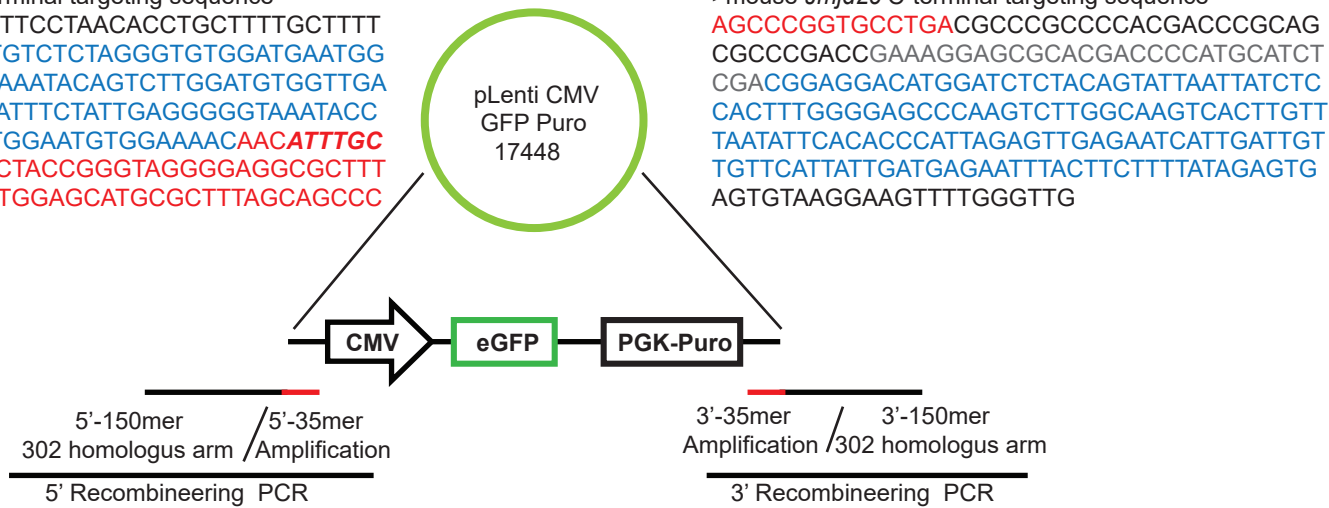

5'TGCTTTTTTCTCTCCCT**GTCTTTGTCTCTAGG**3'  
 5'TGCTTTTTTCTCTCCCT**GTCTTTGTCTCTAGG**3'

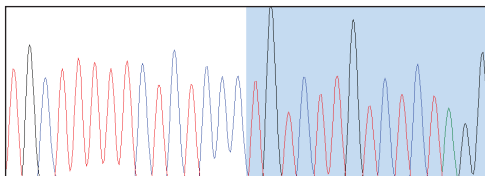

5'CCCATGCATCTCGAC**GGAGGACATGGATC**3'  
 5'**GATCCATGTCCTCCG**TCGAGATGCATGGGG3'

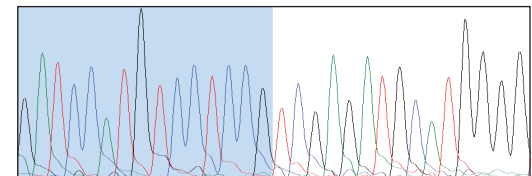**D**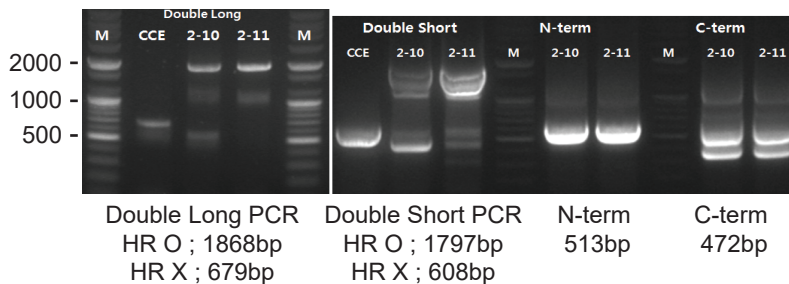**E**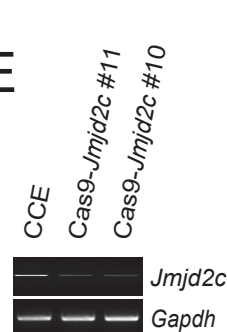**F**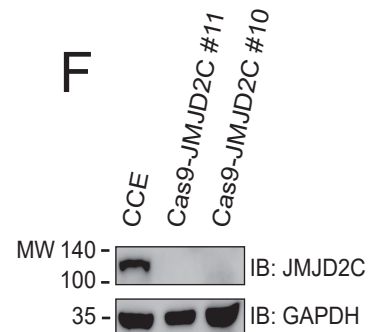

Figure S3

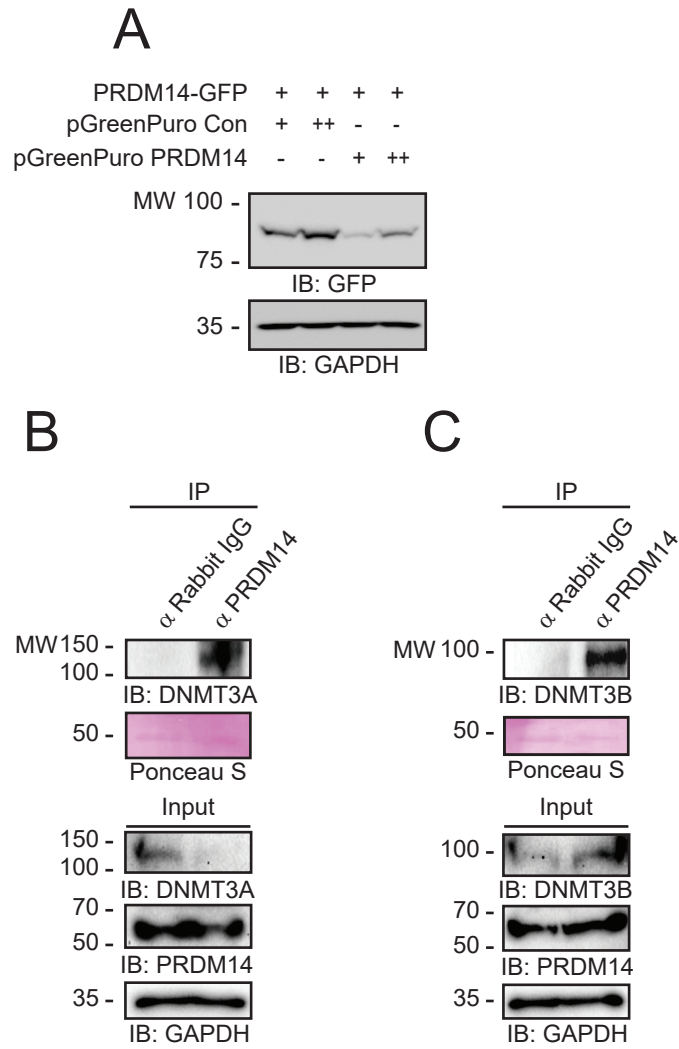

Figure S4



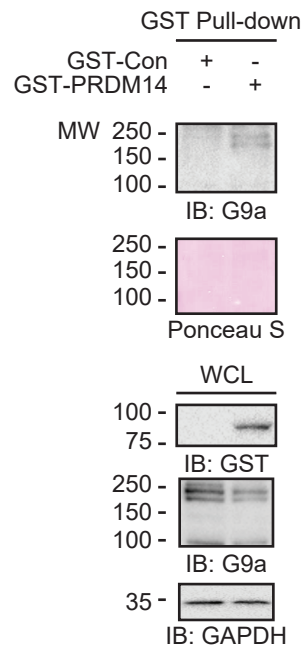

Figure S5

**A**

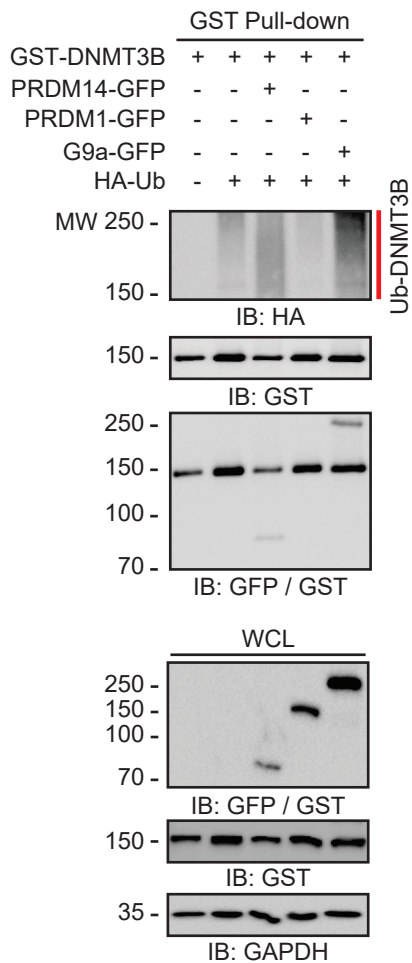

**B**

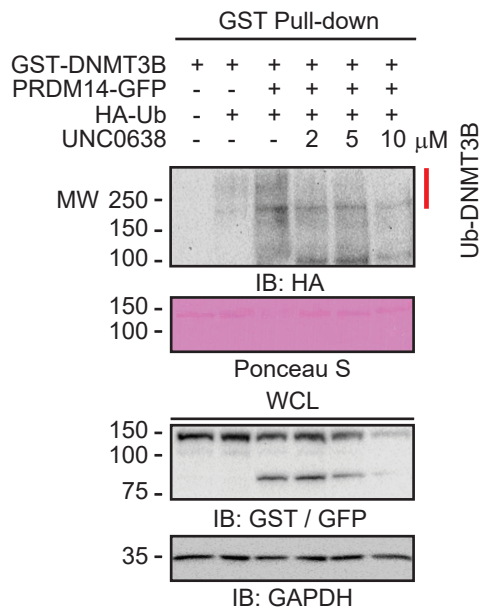

**C**

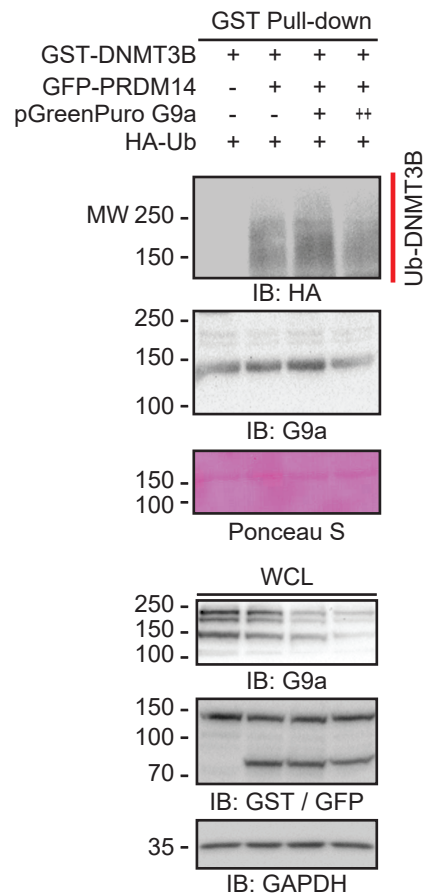

Figure S6

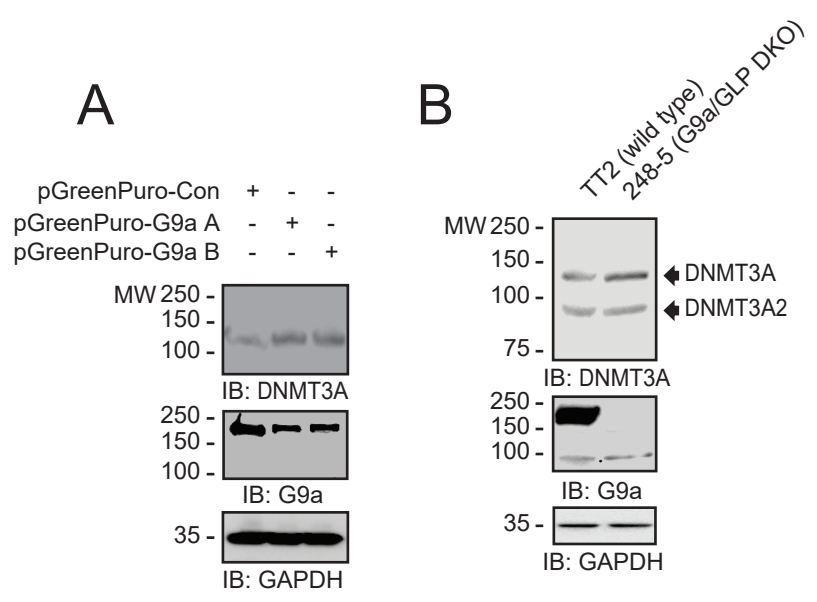

Figure S7

## Supplemental figure legends

### Figure S1 (related to Figure 1)

**PD0325901, but not CHIR99021, specifically decreases phospho-ERK1/2 levels.**

### Figure S2 (related to Figure 3)

**TET1 associates with JMJD2C.**

(A) A pull-down assay shows that TET1 CD, a TET1 catalytic mutant, associates with JMJD2C. (B) A pull-down assay shows that TET1 CD binds to the JmjC and 2×PHD domains in JMJD2C. (C) A pull-down assay shows that JMJD2C associates with the CXXC and CD domains of TET1.

### Figure S3 (related to Figure 3)

***Jmjd2c* KO strategy using CRISPR/Cas9 technology.**

(A) Mouse *Jmjd2c* genomic DNA sequences and a *Jmjd2c*-specific 20-bp guide RNA sequence. (B) T7 Endonuclease I assay shows that a *Jmjd2c*-specific guide RNA effectively targets *Jmjd2c* genomic DNA. (C) To disrupt genomic regions of the *Jmjd2c* gene through homologous recombination with an antibiotic puromycin cassette, we designed the primers containing the gene-specific homologous sequences (150 bp) with amplifying gene sequences (30 bp) for the PGK-Puro cassette using pLenti GFP Puro (Addgene Plasmid #17448) as a template. (D) Puromycin-resistant ESC colonies are determined by increasing PCR size due to the insertion of HR donor into *Jmjd2c* genomic DNA. To identify HR donor insertion by homologous recombination, 5' and 3' gene-specific primers were chosen from the adjacent upstream and downstream regions of the HR destination site in *Jmjd2c*. (E) *Jmjd2c*-KO clones have reduced *Jmjd2c* mRNA levels compared with control CCE cells, determined using RT-PCR assay. (F) *Jmjd2c*-KO clones do not express JMJD2C proteins as revealed by a Western blot.

### Figure S4 (related to Figure 4)

**PRDM14 associates with DNMT3A and DNMT3B.**

(A) pGreenPuro *Prdm14*, a *Prdm14* shRNA, decreases PRDM14 expression

(B) Endogenous PRDM14 binds to DNMT3A in an immunoprecipitation assay. (C) Endogenous DNMT3B associates with PRMD14 in an immunoprecipitation assay.

**Figure S5 (related to Figure 5)**

**GST-PRDM14 associates with endogenous G9a in a pull-down assay.**

**Figure S6 (related to Figure 5)**

**PRDM14-mediated G9a promotes DNMT3B ubiquitination.**

(A) DNMT3B ubiquitination is increased in proportion to the expression of G9a > PRDM14 > Control > PRDM1 in a GST pull-down assay. (B) A GST pull-down assay shows that DNMT3B ubiquitination is increased by PRDM14, whereas UNC0638 inhibits a PRDM14-mediated DNMT3B degradation in a dose-dependent manner. (C) Silencing of endogenous G9a using pGreenPuro G9a reduces DNMT3B ubiquitination.

**Figure S7 (related to Figure 7)**

**G9a/GLP deficiency causes an increase of DNMT3A protein levels.**

(A) Western blots show that knockdown of G9a expression by pGreenPuro G9a-A and -B increases endogenous DNMT3A expression. (B) Western blots reveal that deficiency of G9a and GLP increases DNMT3A protein levels in the 248-5 ESC cell line compared with wild-type TT2 cells.



## **Supplemental table legend**

### **Supplemental Table S1 (related to Figure 1E)**

#### **Quantitative gene expression data induced by combinatorial 2i treatments in ESCs**

Bioinformatics data come from the GSE43597 in GEO DataSet.
